# Supplementary material
Source: PubMed Central journal article supplement (PMC4006997)
Supplement: NIHMS549711-supplement-Saxena_Supplementary_Material.pdf [file NIHMS549711-supplement-Saxena_Supplementary_Material.pdf]

## Saxena et al. Science Translation Medicine Sept 2011

### Supplementary Table S1

Oligonucleotide primer sequences and PCR product sizes used in real-time PCRs to quantify the expression of murine cytokine, RRV gene and Human DC related gene

| <b>Gene</b>   | <b>Primer Sequences</b>                                                    | <b>Temp (°C)</b> | <b>Size (bp)</b> |
|---------------|----------------------------------------------------------------------------|------------------|------------------|
| <i>Il15</i>   | For: 5'-AGGAATACATCCATCTCGTGCTAC-3'<br>Rev: 5'-ACTGACACAGCCCCAAAATGAAG-3'  | 50.1             | 96               |
| <i>Gapdh</i>  | For: 5'-TGGTTTGACAATGAATACGGCTAC-3'<br>Rev: 5'-GGTGGGTGGTCCAAGGTTTC-3'     | 53.4             | 92               |
| <i>Nsp3</i>   | For: 5'-TGTCAAGAGAATACCTGGGAAATC-3'<br>Rev: 5'-GGAATCATCAACTTCAACTTCACC-3' | 48.2             | 97               |
| <i>LILRA4</i> | For: 5'-TACAGGTGCTACGGCTCACG-3'<br>Rev: 5'-CTGACTTCTTTTGTGCTGGATTG -3'     | 55.8             | 118              |
| <i>TLR7</i>   | For: 5'- CAGAAGTCCAAGTTCCTCCAGC-3'<br>Rev: 5'- GACACTGCCAGAAGTATGGGTG -3'  | 54.2             | 100              |
| <i>NRP1</i>   | For: 5'- AAGGGGACAGAACTGGATGC -3'<br>Rev: 5'- GGTCTATTTGGAGCCACTCATTG -3'  | 54.6             | 111              |
| <i>GAPDH</i>  | For: 5'- TGACATCAAGAAGGTGGTGAAGC -3'<br>Rev: 5'- TCAAAGGTGGAGGAGTGGGTG -3' | 56.8             | 120              |

Temp: annealing temperature

Size (bp): product size in base pairs

# Figure S1

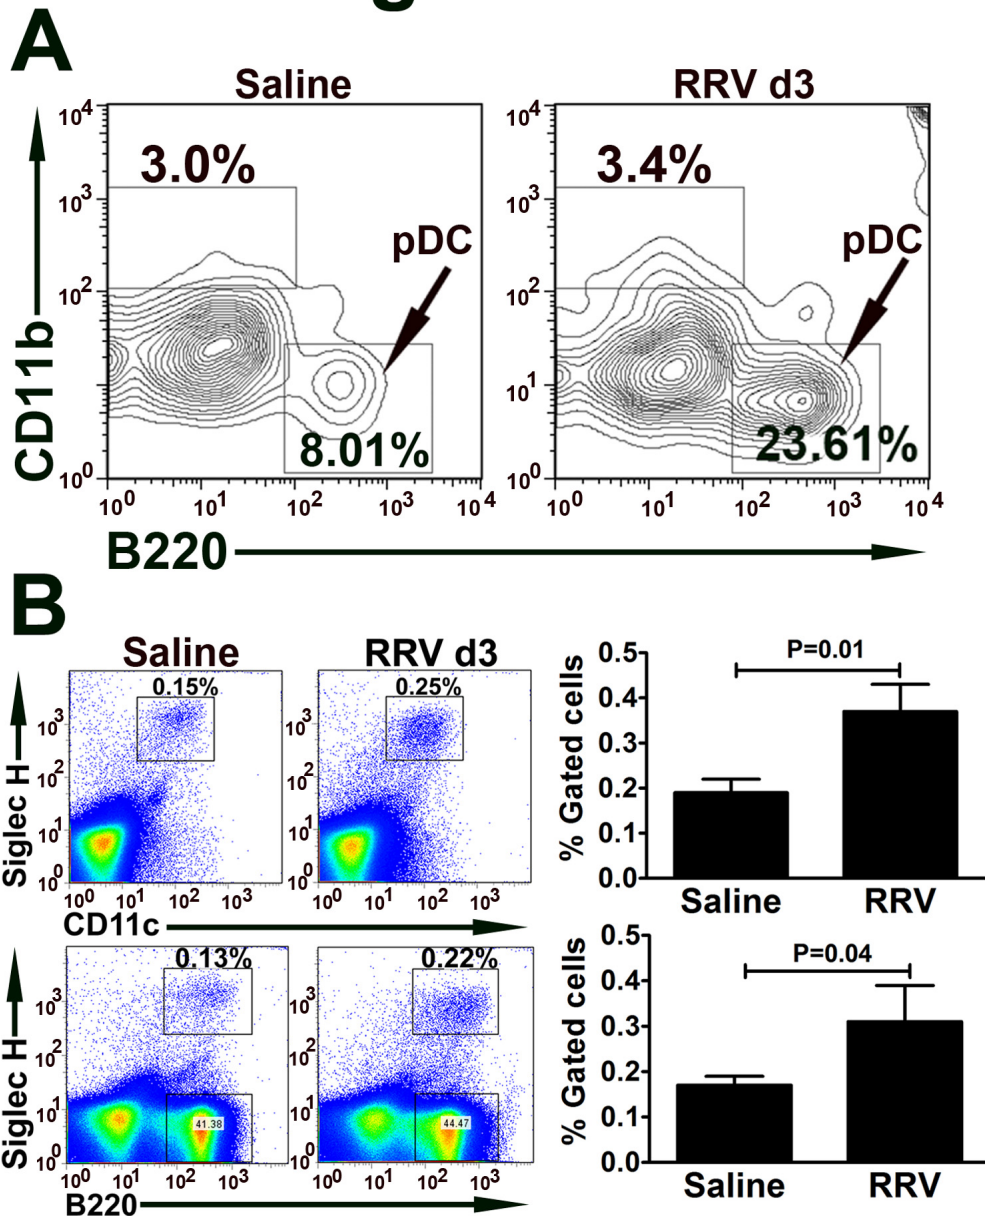

**Quantification of hepatic pDCs after RRV challenge.** Flow cytometric analyses of hepatic mononuclear cells included an initial size gating, exclusion of 7AAD<sup>+</sup> cells, gating on CD11c<sup>+</sup> cells, then quantification of CD11b<sup>-</sup>B220<sup>+</sup> cells (panel **A**) or Siglec H (panel **B**) 3 days after saline or RRV challenge. Numbers in contour or dot plots represent % of gated cells. Graphs in panel **B** show the mean  $\pm$  S.D. of % gated cells from 3 different experiments; N=4-7 livers per group in each experiment).

## Figure S2

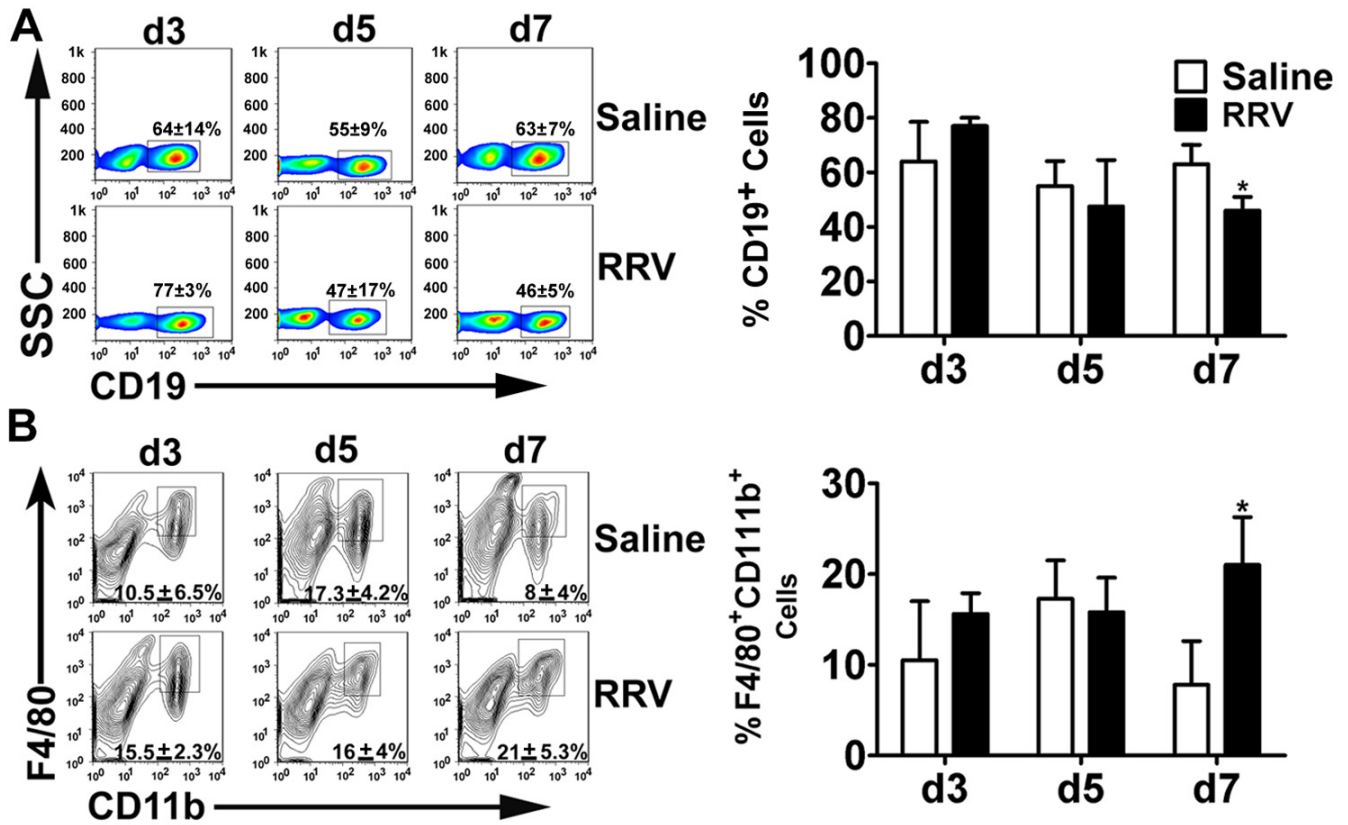

**Quantification of hepatic B cells and macrophages after RRV challenge.** Panel **A** shows dot plots from flow cytometric analyses of hepatic mononuclear cells stained with anti-CD19 antibodies at days 3, 5, and 7 after saline or RRV injection of newborn mice. In panel **B**, contour plots of cells stained with anti-F4/80 and CD11b antibodies in the same experimental setting. Results depict mean  $\pm$  S.D. N=3-4 mice per group and time point; \*P<0.05 (all other groups have P>0.05).

# Figure S3

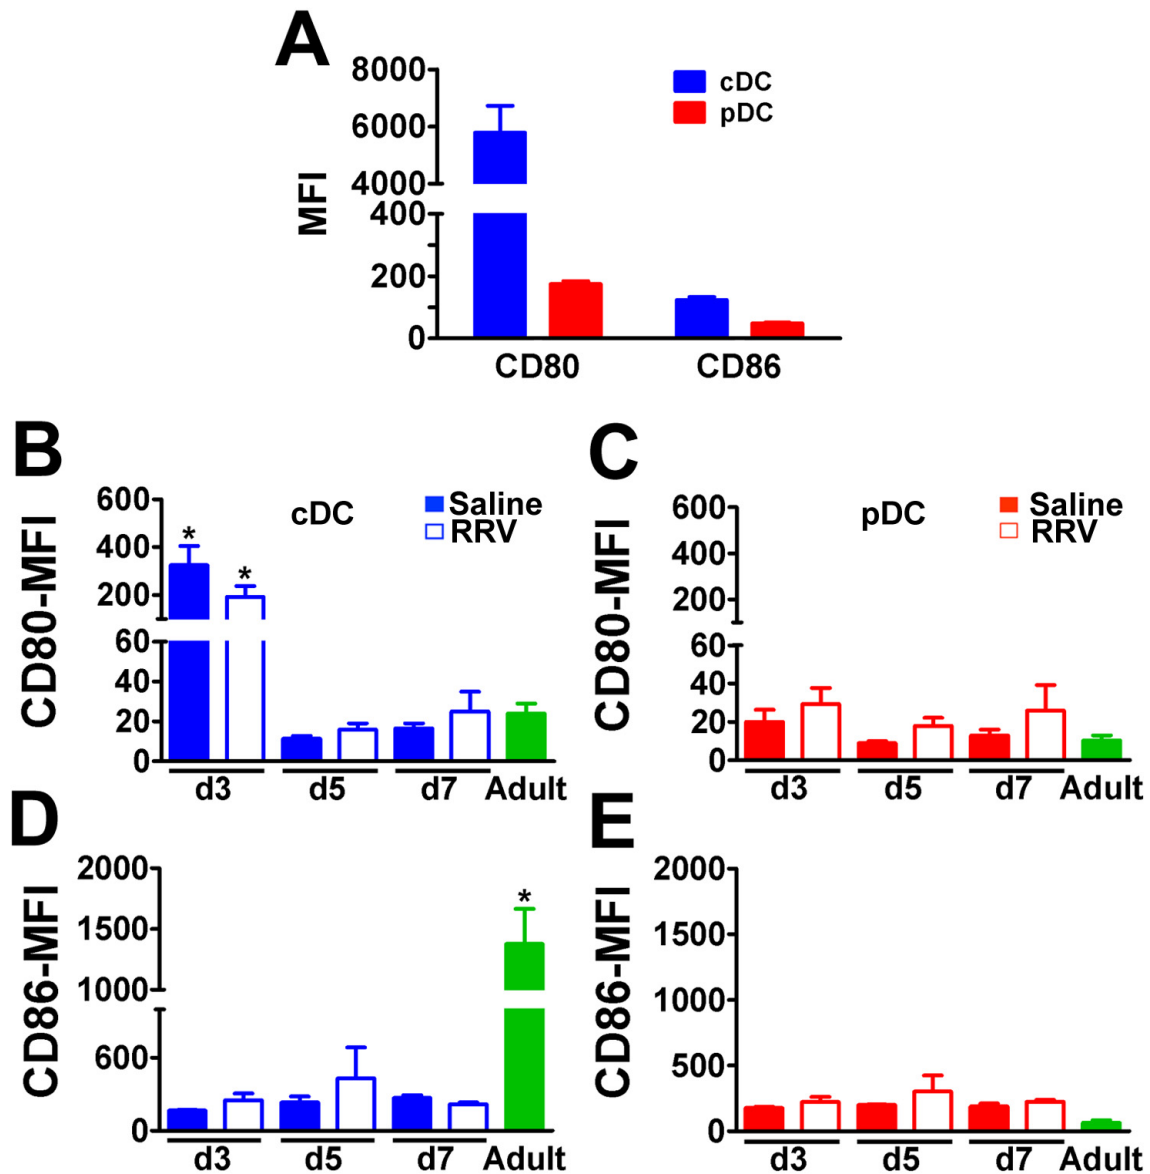

**Expression of co-stimulatory markers in hepatic DCs.** Panel A shows the mean fluorescence intensity (MFI) of co-stimulatory markers CD80 and CD86 expression in live (7AAD-) hepatic mononuclear cell gated for pDC (CD11c<sup>+</sup>CD11b<sup>-</sup>PDCA1<sup>+</sup>B220<sup>+</sup>) and cDCs (CD11c<sup>+</sup>PDCA1<sup>-</sup>) at birth. Panel B shows the MFI at day 3 (d3), day 5 (d5) and day 7 (d7) after injection of saline or RRV soon after birth and in adult Balb/c mice. The data for saline and adult groups are the same as Figure 3. Data are shown as mean  $\pm$  SD of 3 separate experiments; N=4-7 livers per group per time point. \*P<0.01 (all other groups have P>0.05).

## Figure S4

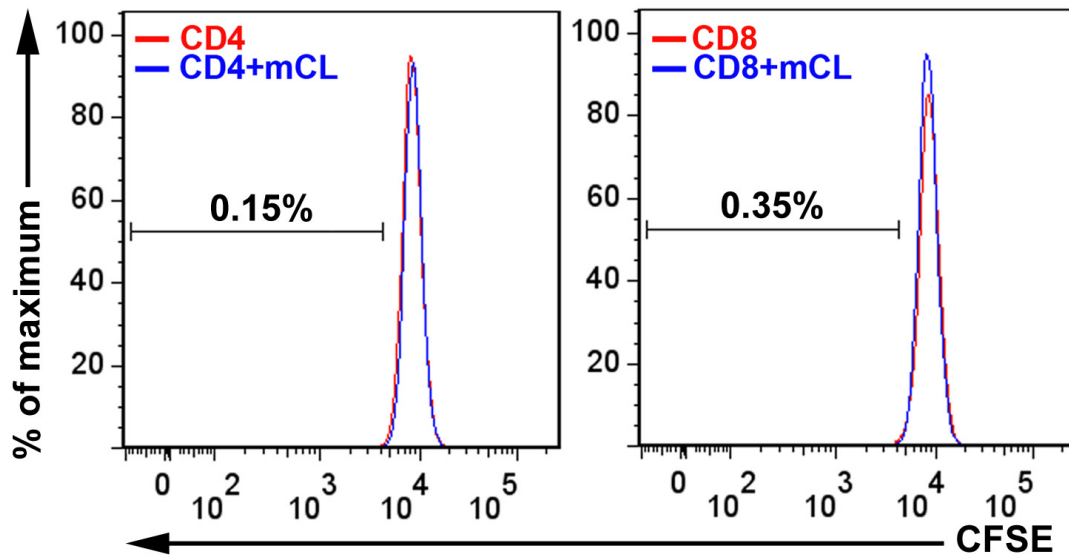

**Effect of cholangiocytes on proliferation of CD4<sup>+</sup> and CD8<sup>+</sup> cells.** Co-culture of a murine cholangiocytes (mCL) cell line infected with RRV does not induce proliferation of hepatic CD4<sup>+</sup> and CD8<sup>+</sup> cells (isolated from livers of 3 day old mice injected with saline) after 48 hours of culture.

# Figure S5

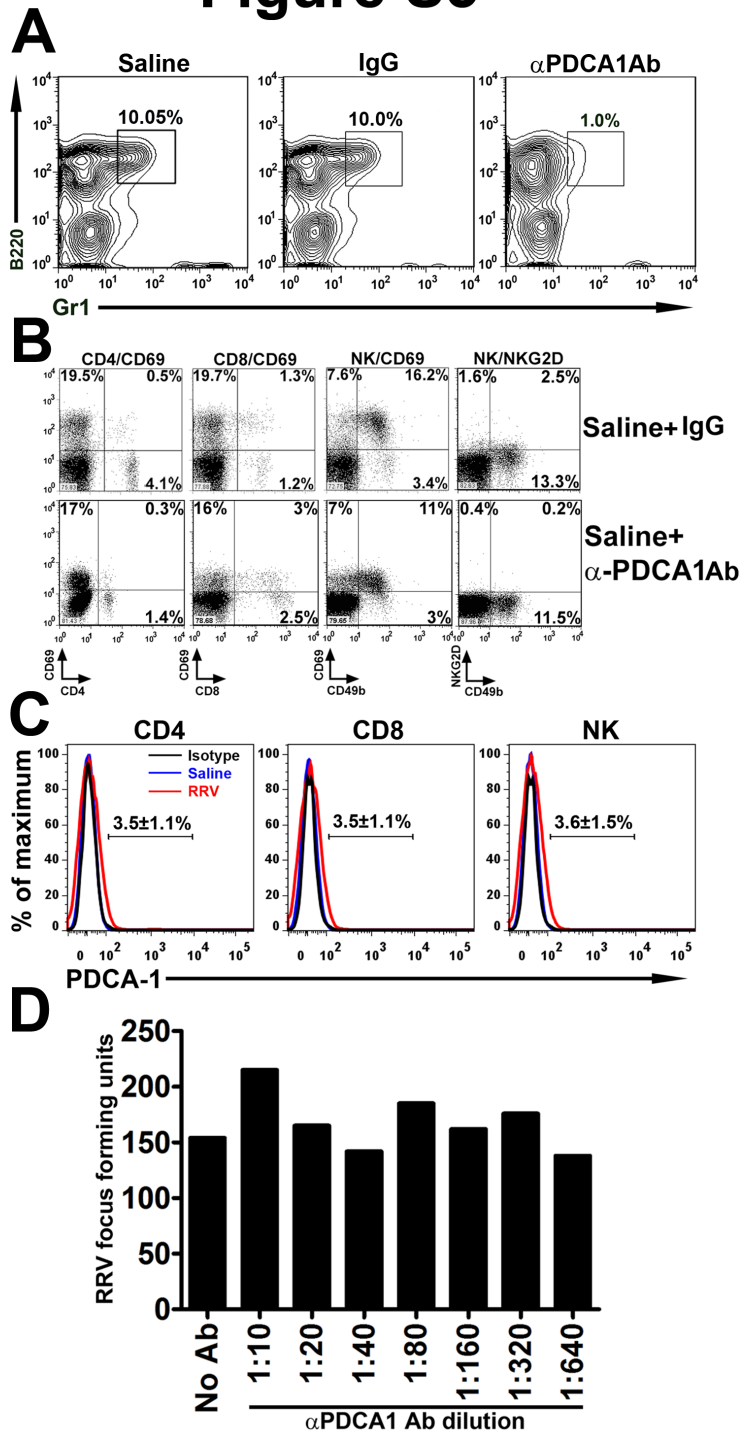

**Depletion of pDCs by anti-PDCA1 antibodies.** In panel **A**, flow cytometric contour plots show a decrease in B220<sup>+</sup>Gr1<sup>+</sup> cells from livers of mice 24 hours after injection of 50  $\mu$ g of anti-PDCA1 antibodies or IgG control isotype (also shown is a saline control group without administration of anti-PDCA1 or IgG isotype). N=3 mice per group. In **B**, flow cytometric analyses showing the impact of administration of anti-PDCA antibodies to control mice (i.e. injected with saline + IgG isotype, not with RRV). Values in each quadrant represent % cells positive for respective cell surface markers; representative results of 3 experiments. Panel **C** shows minimal changes in the expression of PDCA1 by CD4<sup>+</sup>, CD8<sup>+</sup>, and NK cells 3 days after injection of RRV when compared to saline and IgG isotype (values within the histogram represent mean  $\pm$  S.D. of % gated cells). In **D**, viral titer is depicted after MAE cells are cultured in the absence or with different dilutions of anti-PDCA1 antibody for 48 hours.

## Figure S6

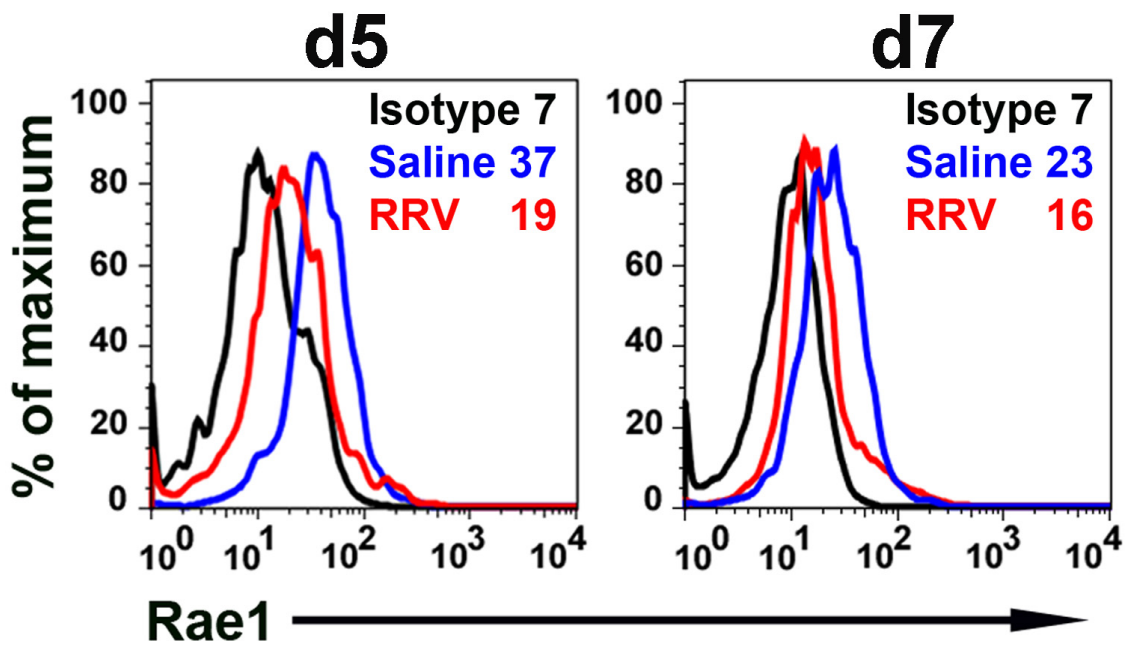

**Rae1 expression in hepatic pDCs.** Flow cytometric histograms show downregulation of Rae1 levels in hepatic pDCs 5 and 7 days after RRV challenge comparable to levels seen in saline (representative data from two independent experiments).
